# Supplementary material for: Blood Metabolite Profiling of Antarctic Expedition Members: An 1H NMR Spectroscopy-Based Study
Source: MDPI journal article supplement (doi:10.3390/ijms24098459), 2023-05-08
Supplement: s1 [file s1]

# Blood Metabolite Profiling of Antarctic Expedition Members: An $^1\text{H}$ NMR Spectroscopy-Based Study

Laura Del Coco <sup>1,†</sup>, Marco Greco <sup>1,†</sup>, Alessandra Inguscio <sup>1</sup>, Anas Munir <sup>1,2</sup>, Antonio Danieli <sup>1</sup>, Luca Cossa <sup>1</sup>, Debora Musarò <sup>1</sup>, Maria Rosaria Coscia <sup>3</sup>, Francesco Paolo Fanizzi <sup>1,\*</sup> and Michele Maffia <sup>1,\*</sup>

<sup>1</sup> Department of Biological and Environmental Science and Technology, University of Salento, Via Lecce—Monteroni, 73100 Lecce, Italy; laura.delcoco@unisalento.it (L.D.C.); marco.greco@unisalento.it (M.G.); ale.inguscio@unisalento.it (A.I.); anas.munir@studenti.unisalento.it (A.M.); antonio.danieli@unisalento.it (A.D.); lucagiulio.cossa@unisalento.it (L.C.); debora.musaro@unisalento.it (D.M.)

<sup>2</sup> Department of Mathematics and Physics “E. De Giorgi”, University of Salento, Via Lecce—Arnesano, 73100 Lecce, Italy

<sup>3</sup> Institute of Biochemistry and Cell Biology, National Research Council of Italy, Via P. Castellino 111, 80131 Naples, Italy; mariarosaria.coscia@ibbc.cnr.it

\* Correspondence: fp.fanizzi@unisalento.it (F.P.F.); michele.maffia@unisalento.it (M.M.); Tel.: +0039-0832-299265 (F.P.F.); +0039-0832-298670 (M.M.)

† These authors contributed equally to this work.

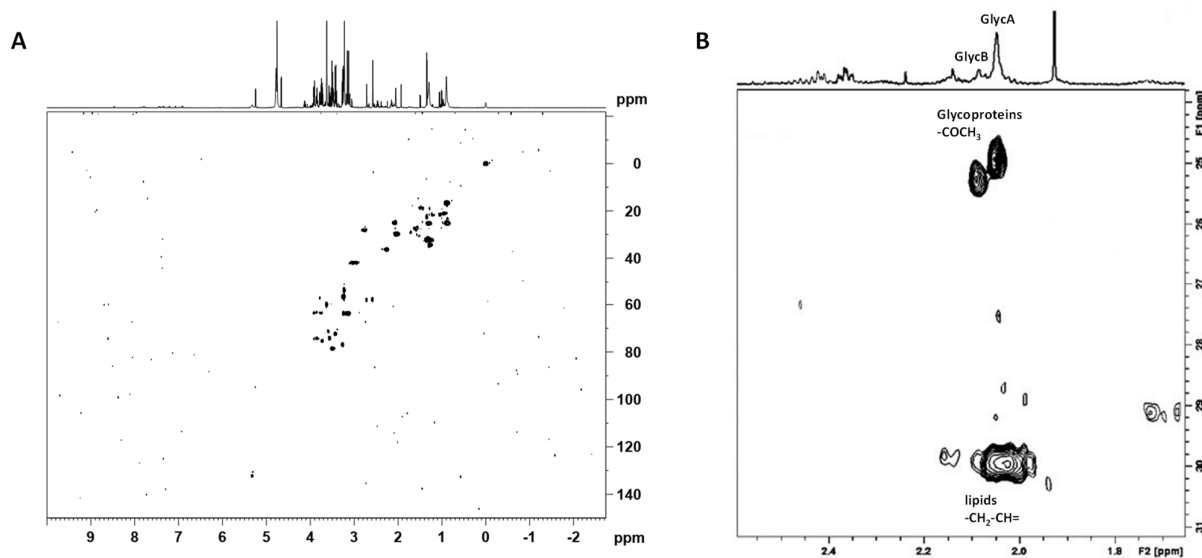

**Figure S1.** A) 600MHz  $^1\text{H}$ - $^{13}\text{C}$  HSQC spectrum of human serum and B) relative expansion in the region 2.5-1.5 ppm (for  $^1\text{H}$ ) and 31-20 ppm (for  $^{13}\text{C}$ ); -COCH<sub>3</sub> acetyl groups of glycoproteins, GlycA and GlycB [19].

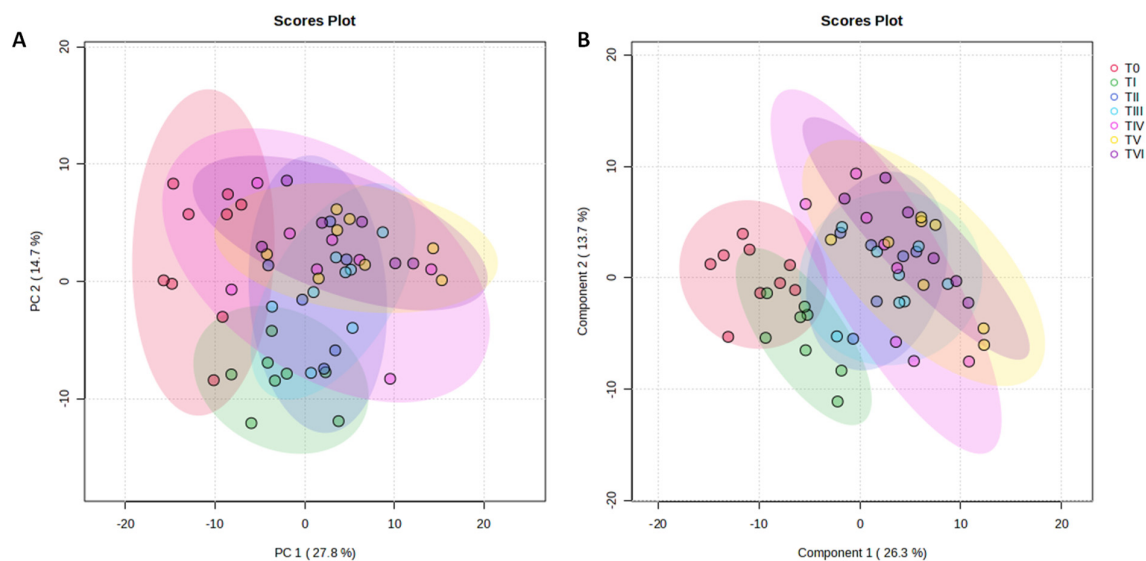

**Figure S1. A)** PCA and **(B)** PLS-DA score plots obtained from the explorative (PCA model) and supervised (PLS-DA model) analyses performed on the whole spectral data. From statistical analyses, relatively higher levels of glucose, glutamate and N-acetyl glycoproteins (GlycA) and relative low content of lipids and glutamine were found in samples collected at time “T0”, with respect to the other serum samples (PCA = principal component analysis; PLS-DA = partial least squares discriminant analysis initial sampling session (T0) and subsequent samplings after 7 (TII), 14 (TIII), 90 (TIV), 180 (TV), and 270 (TVI) days from the arrival.

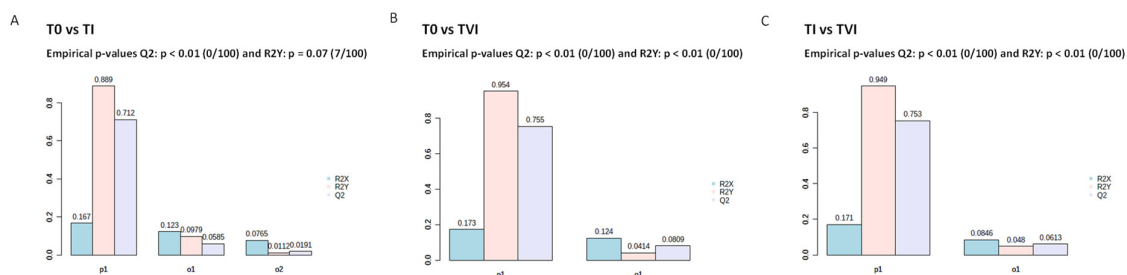

**Figure S2.** The overview of the OPLS-DA model performance for the selected groups and the permutation test. R<sup>2</sup>X and R<sup>2</sup>Y refer to the goodness and represent the model interpretation rate. Q<sup>2</sup> refers to the predicted variation (quality of prediction). R<sup>2</sup>Y and Q<sup>2</sup> closer to 1 indicate the more stable and reliable model.

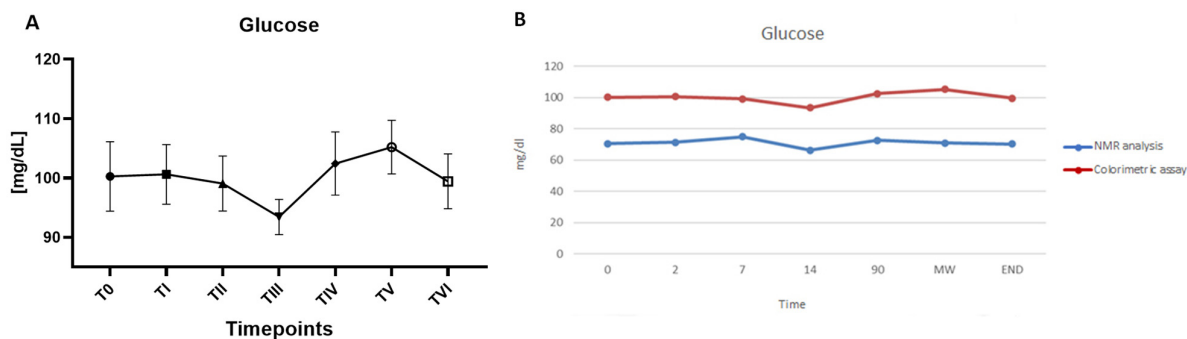

**Figure S3. A)** Colorimetric assay for glucose circulating levels of subjects in correspondence of the different timepoints. Values are represented as mean  $\pm$  SEM. Error bar indicates the interindividual fluctuation in the measured concentrations; **B)** Bruker ERETIC measurements used to directly measure the concentration of blood glucose. A good correlation has been obtained considering the concentration (mg/dL) calculated from the NMR spectra ( $^1\text{H}$  NMR signal at 5.25 ppm) and the colorimetric assay.

**Table S1.** Representative  $^1\text{H}$  and  $^{13}\text{C}$  NMR assignments of metabolites identified in human serum samples at 600 MHz (bs: broad signal; d: doublet; s: singlet; q: quartet; m: multiplet).

| Metabolite               | $\delta_{\text{H}}$ ppm (multiplicity, assignment)/ $\delta_{\text{C}}$ ppm                                                                                                                     |
|--------------------------|-------------------------------------------------------------------------------------------------------------------------------------------------------------------------------------------------|
| Acetate                  | 1.92 (s, $\text{CH}_3$ )/25.98                                                                                                                                                                  |
| Acetoacetate             | 2.24 (s, $\text{CH}_3$ )                                                                                                                                                                        |
| Alanine                  | 1.47(d, $\text{CH}_3$ )/18.4                                                                                                                                                                    |
| Choline                  | 3.20 (s, $\text{N}(\text{CH}_3)_3$ )/56.71                                                                                                                                                      |
| Citrate                  | 2.54(d, half $\text{CH}_2$ ); 2.68(d, half $\text{CH}_2$ )                                                                                                                                      |
| Creatine/phosphocreatine | 3.04(s, $\text{CH}_3$ )/42.19; 3.96(s, $\text{CH}_2$ )                                                                                                                                          |
| Formate                  | 8.46 (s, CH)                                                                                                                                                                                    |
| Glycerol                 | 3.58(m, $\text{CH}_2$ ), 65.4; 3.67 (m, $\text{CH}_2$ ), 65.4                                                                                                                                   |
| Glycine                  | 3.57 (s, $\text{CH}_2$ )/43.2                                                                                                                                                                   |
| Glucose                  | 3.25 (m, CH)/76.96; 3.42(m, CH)/72.5; 3.48(m, CH)/78.6; 3.55(m, CH)/74.27; 3.72(m, CH)/63.3; 3.85(m, CH)/63.4; 3.91/63.53; (m, $\text{CH}_2$ ); 4.64(d, CH); 5.24(d, CH)/94.88                  |
| Glutamate                | 2.08(m, half $\text{CH}_2$ )/29.84; 2.13(m, half $\text{CH}_2$ )/29.86; 2.36 (m, $\text{CH}_2$ )/36.4; 3.78 (m, CH)/57.21                                                                       |
| Glutamine                | 2.15(m, half $\text{CH}_2$ )/29.88; 2.42(m, half $\text{CH}_2$ )/36.48                                                                                                                          |
| 3-Hydroxybutyrate        | 1.20(d, $\text{CH}_3$ )/21.61                                                                                                                                                                   |
| Histidine                | 7.07 (s, CH); 7.79 (s, CH)                                                                                                                                                                      |
| Isoleucine               | 0.94(t, $\text{CH}_3$ )/13.69; 1.02 (d, $\text{CH}_3$ )                                                                                                                                         |
| Lactate                  | 1.33(d, $\text{CH}_3$ )/22.9; 4.12 (q, CH)/71.4                                                                                                                                                 |
| Leucine                  | 0.98(t, $\text{CH}_3$ )/24.8; 1.73 (m, CH, $\text{CH}_2$ )/42.72                                                                                                                                |
| Lipids, LDL              | 0.87(bs, $\text{CH}_3$ )/16.74; 1.29(bs, $\text{CH}_{2n}$ )/34.7; 1.57(m, $\text{CH}_2\text{CH}_2\text{COOC}$ )/27.53; 2.01(m, $\text{CH}_2\text{CH=}$ )/29.9; 5.32(m, $\text{CH=CH}$ )/132.43  |
| Lipids, VLDL             | 0.90(bs, $\text{CH}_3$ )/25.33; 1.32(bs, $\text{CH}_{2n}$ )/32.35; 1.57(m, $\text{CH}_2\text{CH}_2\text{COOC}$ )/27.53; 2.01(m, $\text{CH}_2\text{CH=}$ )/29.9; 5.32(m, $\text{CH=CH}$ )/132.43 |
| N-acetyl glycoproteins   | 2.05-2.07 (bs, $\text{COCH}_3$ )/29.92                                                                                                                                                          |
| Phenylalanine            | 7.34(d, CH ring); 7.39(m, CH ring ); 7.43(m, CH ring )                                                                                                                                          |
| Tyrosine                 | 6.90 (d, CH ring); 7.20 (d, CH ring)                                                                                                                                                            |
| Unidentified             | 2.82 (s, $\text{CH}_3$ )/32.53                                                                                                                                                                  |
| Valine                   | 1.00(d, $\text{CH}_3$ )/19.7; 1.05 (d, $\text{CH}_3$ )/20.7; 2.28 (m, CH)/31.9                                                                                                                  |



**Table S3.** Results from Pathway Analysis with MetPA for serum samples T0 vs T1 (Total number of compounds involved in each pathway and metabolites matched from the uploaded data;  $p$  is the original  $p$ -value calculated from the enrichment analysis; the impact is the pathway impact value calculated from pathway topology analysis).

| ID | Pathway name                                | Total | Hits | $p$ -value | $-\log(p)$ | Holm $p$ | FDR       | Impact         |
|----|---------------------------------------------|-------|------|------------|------------|----------|-----------|----------------|
| A  | D-glutamine and D-glutamate metabolism      | 6     | 2    | 0.0001758  | 6.755      | 0.028128 | 0.0004688 | <b>0.50</b>    |
| B  | Alanine, aspartate and glutamate metabolism | 28    | 2    | 0.0001758  | 6.755      | 0.028128 | 0.0004688 | <b>0.3109</b>  |
| C  | Arginine biosynthesis                       | 14    | 2    | 0.0001758  | 6.755      | 0.028128 | 0.0004688 | <b>0.11675</b> |

**Table S4.** Results from Pathway Analysis with MetPA for serum samples T0 vs TVI (Total number of compounds involved in each pathway and metabolites matched from the uploaded data;  $p$  is the original  $p$ -value calculated from the enrichment analysis; the impact is the pathway impact value calculated from pathway topology analysis).

| ID | Pathway name                                | Total | Hits | $p$ -value | $-\log(p)$ | Holm $p$ | FDR      | Impact         |
|----|---------------------------------------------|-------|------|------------|------------|----------|----------|----------------|
| A  | D-glutamine and D-glutamate metabolism      | 6     | 1    | 2.06E-04   | 76.851     | 2.06E-03 | 2.06E-04 | <b>0.5</b>     |
| B  | Alanine, aspartate and glutamate metabolism | 28    | 1    | 2.06E-04   | 76.851     | 2.06E-03 | 2.06E-04 | <b>0.19712</b> |
| C  | Arginine biosynthesis                       | 14    | 1    | 2.06E-04   | 76.851     | 2.06E-03 | 2.06E-04 | <b>0.11675</b> |

**Table S5.** Results from Pathway Analysis with MetPA for serum samples T1 vs TVI (Total number of compounds involved in each pathway and metabolites matched from the uploaded data;  $p$  is the original  $p$ -value calculated from the enrichment analysis; the impact is the pathway impact value calculated from pathway topology analysis).

| ID | Pathway name                                         | Total | Hits | $p$ -value | $-\log(p)$ | Holm $p$ | FDR      | Impact         |
|----|------------------------------------------------------|-------|------|------------|------------|----------|----------|----------------|
| A  | Phenylalanine, tyrosine, and tryptophan biosynthesis | 4     | 2    | 0.0066599  | 61.765     | 0.053279 | 0.001776 | <b>1.0</b>     |
| B  | Phenylalanine metabolism                             | 10    | 2    | 0.0066599  | 61.765     | 0.053279 | 0.001776 | <b>0.35714</b> |

**Table S6.** List of collected samples at different test sampling time (days).

| Blood test sampling time (days) |    |    |     |      |     |    |     |
|---------------------------------|----|----|-----|------|-----|----|-----|
| Sample ID                       | T0 | T1 | TII | TIII | TIV | TV | TVI |
| A                               | 0  | 2  | 7   | 14   | 90  | MW | END |
| B                               | 0  | 2  | 7   | 14   | 90  | MW | END |
| C                               | 0  | 2  | 7   | 14   | 90  | MW | END |
| D                               | 0  | 2  | 7   | 14   | 90  | MW | END |
| F                               | 0  | 2  | 7   | 14   | 90  | MW | END |
| G                               | 0  | 2  | 7   | 14   | 90  | MW | END |
| H                               | 0  | 2  | 7   | 14   | 90  | MW | END |
| K                               | 0  | 2  | 7   | 14   | 90  | MW | END |
